# Supplementary material
Source: publisher figshare collection journal article supplement (https://brill.figshare.com/articles/dataset/_/8858072)
Supplement: Supplementary file 1 [file 2]

**The evolutionary history of the white wagtail species complex,  
(Passeriformes: Motacillidae: *Motacilla alba*)**

*Maliheh Pirayesh Shirazinejad*

Department of Biology, Faculty of Science, Ferdowsi University of Mashhad,  
Mashhad, Iran

*Mansour Aliabadian*

Department of Biology, Faculty of Science, Ferdowsi University of Mashhad,  
Mashhad, Iran

Research Department of Zoological Innovations, Institute of Applied Zoology,  
Faculty of Science, Ferdowsi University of Mashhad, Mashhad, Iran

*aliabadi@um.ac.ir*

*Omid Mirshamsi*

Department of Biology, Faculty of Science, Ferdowsi University of Mashhad,  
Mashhad, Iran

Research Department of Zoological Innovations, Institute of Applied Zoology,  
Faculty of Science, Ferdowsi University of Mashhad, Mashhad, Iran

**Supplementary material**

SUPPLEMENTARY TABLE S1 Information samples in this study and previous papers

| Seq. ID | Species name   | Specimen number | ND2      | CR       | CHD1Z    | Sample locality     | Locality | References | Clade |
|---------|----------------|-----------------|----------|----------|----------|---------------------|----------|------------|-------|
| 274     | <i>M. alba</i> | ZMFUM 140426728 | MK645323 | MK645388 | –        | Kashan              | Iran     | This study | SW    |
| 275     | <i>M. alba</i> | ZMFUM 140426729 | MK645324 | MK645389 | –        | Kashan              | Iran     | This study | SW    |
| 276     | <i>M. alba</i> | ZMFUM 140426730 | MK645325 | MK645390 | –        | Kashan              | Iran     | This study | SW    |
| 277     | <i>M. alba</i> | ZMFUM 140426731 | MK645326 | MK645391 | MK645453 | Kashan              | Iran     | This study | SW    |
| 278     | <i>M. alba</i> | ZMFUM 140412759 | MK645327 | MK645392 | MK645454 | Shamkan             | Iran     | This study | SE    |
| 279     | <i>M. alba</i> | ZMFUM 140412760 | MK645328 | MK645393 | –        | Shamkan             | Iran     | This study | SE    |
| 280     | <i>M. alba</i> | ZMFUM 140426683 | MK645329 | MK645394 | –        | Esfehan             | Iran     | This study | SW    |
| 281     | <i>M. alba</i> | ZMFUM 140428684 | MK645330 | MK645395 | –        | Garmsar, semnan     | Iran     | This study | SE    |
| 282     | <i>M. alba</i> | ZMFUM 140428685 | MK645331 | MK645396 | MK645455 | Garmsar, semnan     | Iran     | This study | SW    |
| 283     | <i>M. alba</i> | ZMFUM 140428686 | MK645332 | MK645397 | MK645456 | Garmsar, semnan     | Iran     | This study | SE    |
| 284     | <i>M. alba</i> | ZMFUM 150606793 | MK645333 | MK645398 | MK645457 | Zanjan              | Iran     | This study | SW    |
| 285     | <i>M. alba</i> | ZMFUM 150606794 | MK645334 | MK645399 | MK645458 | Zanjan              | Iran     | This study | SW    |
| 286     | <i>M. alba</i> | ZMFUM 150606796 | MK645335 | MK645400 | -        | Zanjan              | Iran     | This study | SW    |
| 287     | <i>M. alba</i> | ZMFUM 150414724 | MK645336 | MK645401 | MK645459 | Kerman              | Iran     | This study | SW    |
| 288     | <i>M. alba</i> | ZMFUM 150414725 | MK645337 | MK645402 | –        | Kerman              | Iran     | This study | SW    |
| 289     | <i>M. alba</i> | ZMFUM 150414727 | MK645338 | MK645403 | –        | Kerman              | Iran     | This study | SW    |
| 290     | <i>M. alba</i> | ZMFUM 150622735 | MK645339 | MK645404 | –        | Kurdistan           | Iran     | This study | SW    |
| 291     | <i>M. alba</i> | ZMFUM 150607663 | MK645340 | MK645405 | MK645460 | Boeen Zahra, Qazvin | Iran     | This study | SW    |

|            |                |                 |          |          |          |                     |      |            |    |
|------------|----------------|-----------------|----------|----------|----------|---------------------|------|------------|----|
| <b>292</b> | <i>M. alba</i> | ZMFUM 150607664 | MK645341 | MK645406 | –        | Boeen Zahra, Qazvin | Iran | This study | SW |
| <b>293</b> | <i>M. alba</i> | ZMFUM 150607665 | MK645342 | MK645407 | MK645461 | Boeen Zahra, Qazvin | Iran | This study | SW |
| <b>294</b> | <i>M. alba</i> | ZMFUM 140609652 | MK645343 | MK645408 | –        | Astara              | Iran | This study | SW |
| <b>295</b> | <i>M. alba</i> | ZMFUM 140609654 | MK645344 | MK645409 | MK645462 | Astara              | Iran | This study | SW |
| <b>296</b> | <i>M. alba</i> | ZMFUM 140609655 | MK645345 | MK645410 | –        | Astara              | Iran | This study | SW |
| <b>297</b> | <i>M. alba</i> | ZMFUM 140610743 | MK645346 | MK645411 | –        | Salmanshahr         | Iran | This study | SW |
| <b>298</b> | <i>M. alba</i> | ZMFUM 140610744 | MK645347 | MK645412 | –        | Salmanshahr         | Iran | This study | SW |
| <b>299</b> | <i>M. alba</i> | ZMFUM 140610745 | MK645348 | MK645413 | –        | Salmanshahr         | Iran | This study | SW |
| <b>300</b> | <i>M. alba</i> | ZMFUM 140610746 | MK645349 | MK645414 | –        | Salmanshahr         | Iran | This study | SW |
| <b>301</b> | <i>M. alba</i> | ZMFUM 140404768 | MK645350 | MK645415 | –        | Tehran              | Iran | This study | SW |
| <b>302</b> | <i>M. alba</i> | ZMFUM 140404769 | MK645351 | MK645416 | MK645463 | Tehran              | Iran | This study | SE |
| <b>303</b> | <i>M. alba</i> | ZMFUM 140404770 | MK645352 | MK645417 | –        | Tehran              | Iran | This study | SW |
| <b>304</b> | <i>M. alba</i> | ZMFUM 140605666 | MK645353 | MK645418 | –        | Bojnord             | Iran | This study | SE |
| <b>305</b> | <i>M. alba</i> | ZMFUM 140605667 | MK645354 | MK645419 | –        | Bojnord             | Iran | This study | SE |
| <b>306</b> | <i>M. alba</i> | ZMFUM 140612747 | MK645355 | MK645420 | –        | Sarakhs             | Iran | This study | SE |
| <b>307</b> | <i>M. alba</i> | ZMFUM 140612687 | MK645356 | MK645421 | –        | Ghouchan            | Iran | This study | SE |
| <b>308</b> | <i>M. alba</i> | ZMFUM 140612688 | MK645357 | MK645422 | –        | Ghouchan            | Iran | This study | SE |
| <b>309</b> | <i>M. alba</i> | ZMFUM 140417761 | MK645358 | MK645423 | –        | Shiraz              | Iran | This study | SW |
| <b>310</b> | <i>M. alba</i> | ZMFUM 140417762 | MK645359 | MK645424 | MK645464 | Shiraz              | Iran | This study | SW |
| <b>311</b> | <i>M. alba</i> | ZMFUM 150411659 | MK645360 | MK645425 | –        | Birjand             | Iran | This study | SE |

|     |                |                 |          |          |          |                             |      |            |    |
|-----|----------------|-----------------|----------|----------|----------|-----------------------------|------|------------|----|
| 312 | <i>M. alba</i> | ZMFUM 140612751 | MK645361 | MK645426 | MK645465 | Sarakhs                     | Iran | This study | SE |
| 313 | <i>M. alba</i> | ZMFUM 150413791 | MK645362 | MK645427 | –        | Zabol                       | Iran | This study | SE |
| 314 | <i>M. alba</i> | ZMFUM 140610656 | MK645363 | MK645428 | –        | Babolsar                    | Iran | This study | SW |
| 315 | <i>M. alba</i> | ZMFUM 150621713 | MK645364 | MK645429 | MK645466 | Dehloran, Ilam              | Iran | This study | N  |
| 316 | <i>M. alba</i> | ZMFUM 150621716 | MK645365 | MK645430 | MK645467 | Dehloran, Ilam              | Iran | This study | N  |
| 317 | <i>M. alba</i> | ZMFUM 150621717 | MK645366 | MK645431 | –        | Dehloran, Ilam              | Iran | This study | N  |
| 318 | <i>M. alba</i> | ZMFUM 150621718 | MK645367 | MK645432 | –        | Dehloran, Ilam              | Iran | This study | N  |
| 319 | <i>M. alba</i> | ZMFUM 150616672 | MK645368 | MK645433 | –        | Dezful, Khuzestan           | Iran | This study | N  |
| 320 | <i>M. alba</i> | ZMFUM 150616673 | MK645369 | MK645434 | MK645468 | Dezful, Khuzestan           | Iran | This study | N  |
| 321 | <i>M. alba</i> | ZMFUM 150616674 | MK645370 | MK645435 | –        | Dezful, Khuzestan           | Iran | This study | N  |
| 322 | <i>M. alba</i> | ZMFUM 150616679 | MK645371 | MK645436 | –        | Dezful, Khuzestan           | Iran | This study | N  |
| 323 | <i>M. alba</i> | ZMFUM 150411752 | MK645372 | MK645437 | -        | Sarbishe, South<br>Khorasan | Iran | This study | SE |
| 324 | <i>M. alba</i> | ZMFUM 140620771 | MK645373 | MK645438 | MK645469 | Urmia                       | Iran | This study | SW |
| 325 | <i>M. alba</i> | ZMFUM 140620773 | MK645374 | MK645439 | –        | Urmia                       | Iran | This study | SW |
| 326 | <i>M. alba</i> | ZMFUM 150624739 | MK645375 | MK645440 | –        | Lorestan                    | Iran | This study | SW |
| 327 | <i>M. alba</i> | ZMFUM 150625708 | MK645376 | MK645441 | –        | Hamedan                     | Iran | This study | SE |
| 328 | <i>M. alba</i> | ZMFUM 150623732 | MK645377 | MK645442 | –        | Kermanshah                  | Iran | This study | SW |
| 329 | <i>M. alba</i> | ZMFUM 140610700 | MK645378 | MK645443 | –        | Gorgan                      | Iran | This study | SE |
| 330 | <i>M. alba</i> | ZMFUM 140610702 | MK645379 | MK645444 | MK645470 | Gorgan                      | Iran | This study | SW |
| 331 | <i>M. alba</i> | ZMFUM 150625710 | MK645380 | MK645445 | –        | Hamedan                     | Iran | This study | SW |

|     |                |                    |          |          |          |                              |            |                 |    |
|-----|----------------|--------------------|----------|----------|----------|------------------------------|------------|-----------------|----|
| 332 | <i>M. alba</i> | ZMFUM 150431787    | MK645381 | MK645446 | –        | Yazd                         | Iran       | This study      | SE |
| 333 | <i>M. alba</i> | ZMFUM 150431788    | MK645382 | MK645447 | –        | Yazd                         | Iran       | This study      | SW |
| 334 | <i>M. alba</i> | ZMFUM 150618782    | MK645383 | MK645448 | –        | Yasouj                       | Iran       | This study      | SW |
| 335 | <i>M. alba</i> | ZMFUM 150618784    | MK645384 | MK645449 | –        | Yasouj                       | Iran       | This study      | SW |
| 336 | <i>M. alba</i> | ZMFUM 150618785    | MK645385 | MK645450 | –        | Yasouj                       | Iran       | This study      | SW |
| 337 | <i>M. alba</i> | ZMFUM 150627657    | MK645386 | MK645451 |          | Chaharmahal and<br>Bakhtiari | Iran       | This study      | SE |
| 338 | <i>M. alba</i> | ZMFUM 150627658    | MK645387 | MK645452 | MK645471 | Chaharmahal and<br>Bakhtiari | Iran       | This study      | SW |
| 1   | <i>M. alba</i> | IOZ, SX106/1909    | KT031296 | KT031346 | –        | Huayin, Shaanxi              | Huayin     | Li et al., 2015 | SE |
| 2   | <i>M. alba</i> | IOZ, SX107/1910    | KT031297 | KT031347 | -        | Huayin, Shaanxi              | Huayin     | Li et al., 2015 | SE |
| 3   | <i>M. alba</i> | IOZ, SX108/1911    | KT031298 | KT031348 | –        | Huayin, Shaanxi              | Huayin     | Li et al., 2015 | SE |
| 4   | <i>M. alba</i> | IOZ, NM09067/11492 | KT031299 | KT031349 | –        | Eerguna, Nei mongol          | Nei mongol | Li et al., 2015 | N  |
| 5   | <i>M. alba</i> | IOZ, NM09069/11494 | KT031300 | KT031350 | –        | Eerguna, Nei mongol          | Nei mongol | Li et al., 2015 | N  |
| 6   | <i>M. alba</i> | IOZ, NM09204/11629 | KT031301 | KT031351 | –        | Eerguna, Nei mongol          | Nei mongol | Li et al., 2015 | N  |
| 7   | <i>M. alba</i> | IOZ, NM09205/11630 | KT031302 | KT031352 | –        | Eerguna, Nei mongol          | Nei mongol | Li et al., 2015 | N  |
| 8   | <i>M. alba</i> | IOZ, QY157/11279   | KT031303 | KT031353 | –        | Qingyang, Gansu              | Qingyang   | Li et al., 2015 | SE |
| 9   | <i>M. alba</i> | IOZ, Fj0513/10503  | KT031304 | KT031354 | –        | Minhou, Fujian               | Minhou     | Li et al., 2015 | SE |
| 10  | <i>M. alba</i> | KIZ, TZGC040       | KT031305 | KT031355 | –        | Zunyi, Guizhou               | Zunyi      | Li et al., 2015 | SE |
| 11  | <i>M. alba</i> | KIZ, TZGC060       | KT031306 | KT031356 | –        | Zunyi, Guizhou               | Zunyi      | Li et al., 2015 | SE |
| 12  | <i>M. alba</i> | KIZ, TZGC065       | KT031307 | KT031357 | –        | Zunyi, Guizhou               | Zunyi      | Li et al., 2015 | SE |
| 13  | <i>M. alba</i> | KIZ, TZGC066       | KT031308 | KT031358 | –        | Zunyi, Guizhou               | Zunyi      | Li et al., 2015 | SE |

|    |                |              |          |          |   |                   |           |                 |    |
|----|----------------|--------------|----------|----------|---|-------------------|-----------|-----------------|----|
| 14 | <i>M. alba</i> | KIZ, TZGC068 | KT031309 | KT031359 | – | Zunyi, Guizhou    | Zunyi     | Li et al., 2015 | SE |
| 15 | <i>M. alba</i> | KIZ, TZGC069 | KT031310 | KT031360 | – | Zunyi, Guizhou    | Zunyi     | Li et al., 2015 | SE |
| 16 | <i>M. alba</i> | KIZ, TZGC070 | KT031311 | KT031361 | – | Zunyi, Guizhou    | Zunyi     | Li et al., 2015 | SE |
| 17 | <i>M. alba</i> | KIZ, TZGC071 | KT031312 | KT031362 | – | Zunyi, Guizhou    | Zunyi     | Li et al., 2015 | SE |
| 18 | <i>M. alba</i> | KIZ, TZGC072 | KT031313 | KT031363 | – | Zunyi, Guizhou    | Zunyi     | Li et al., 2015 | SE |
| 19 | <i>M. alba</i> | KIZ, TZGC073 | KT031314 | KT031364 | – | Zunyi, Guizhou    | Zunyi     | Li et al., 2015 | SE |
| 20 | <i>M. alba</i> | KIZ, XYQS075 | KT031315 | KT031365 | – | Xingyi, Guizhou   | Xingyi    | Li et al., 2015 | SE |
| 21 | <i>M. alba</i> | KIZ, XYQS077 | KT031316 | KT031366 | – | Xingyi, Guizhou   | Xingyi    | Li et al., 2015 | SE |
| 22 | <i>M. alba</i> | KIZ, XYQS078 | KT031317 | KT031367 | – | Xingyi, Guizhou   | Xingyi    | Li et al., 2015 | SE |
| 23 | <i>M. alba</i> | KIZ, XYQS079 | KT031318 | KT031368 | – | Xingyi, Guizhou   | Xingyi    | Li et al., 2015 | SE |
| 24 | <i>M. alba</i> | KIZ, XYQS080 | KT031319 | KT031369 | – | Xingyi, Guizhou   | Xingyi    | Li et al., 2015 | SE |
| 25 | <i>M. alba</i> | KIZ, XYQS082 | KT031320 | KT031370 | – | Xingyi, Guizhou   | Xingyi    | Li et al., 2015 | SE |
| 26 | <i>M. alba</i> | KIZ, XYQS083 | KT031321 | KT031371 | – | Xingyi, Guizhou   | Xingyi    | Li et al., 2015 | SE |
| 27 | <i>M. alba</i> | S04486       | KT031322 | KT031372 | – | Guangdong         | Guangdong | Li et al., 2015 | SE |
| 28 | <i>M. alba</i> | IOZ, LJ12012 | KT031323 | KT031373 | – | Lijiang, Yunnan   | Lijiang   | Li et al., 2015 | SE |
| 29 | <i>M. alba</i> | IOZ, LJ12017 | KT031324 | KT031374 | – | Lijiang, Yunnan   | Lijiang   | Li et al., 2015 | SE |
| 30 | <i>M. alba</i> | IOZ, LJ12025 | KT031325 | KT031375 | – | Lijiang, Yunnan   | Lijiang   | Li et al., 2015 | SE |
| 31 | <i>M. alba</i> | IOZ, LJ12026 | KT031326 | KT031376 | – | Lijiang, Yunnan   | Lijiang   | Li et al., 2015 | SE |
| 32 | <i>M. alba</i> | ZMUC, 134107 | KT031328 | KT031378 | – | Jutland, Denmark  | Denmark   | Li et al., 2015 | N  |
| 33 | <i>M. alba</i> | NRM, 571392  | KT031295 | KT031345 | – | Bodensee, Germany | Bodensee  | Li et al., 2015 | N  |

|    |                |               |          |          |   |                      |                 |                      |    |
|----|----------------|---------------|----------|----------|---|----------------------|-----------------|----------------------|----|
| 34 | <i>M. alba</i> | NRM, 571393   | KT031289 | KT031339 | – | Bodensee, Germany    | Bodensee        | Li et al., 2015      | N  |
| 35 | <i>M. alba</i> | NRM, 571395   | KT031290 | KT031340 | – | Kuriles              | Kuriles         | Li et al., 2015      | N  |
| 36 | <i>M. alba</i> | NRM, 571394   | KT031327 | KT031377 | – | Kuriles              | Kuriles         | Li et al., 2015      | N  |
| 37 | <i>M. alba</i> | NRM, 571397   | KT031330 | KT031380 | – | Iran                 | Iran            | Li et al., 2015      | SW |
| 38 | <i>M. alba</i> | NRM, 571398   | KT031291 | KT031341 | – | Scotland, UK         | British Isles   | Li et al., 2015      | N  |
| 39 | <i>M. alba</i> | NRM, 571396   | KT031329 | KT031379 | – | Scotland, UK         | British Isles   | Li et al., 2015      | SW |
| 40 | <i>M. alba</i> | ZMUC, 93.419  | KT031286 | KT031336 | – | Nepal, Patan         | Nepal           | Li et al., 2015      | SE |
| 41 | <i>M. alba</i> | ZMUC, 93.420  | KT031331 | KT031381 | – | Nepal, Manora River  | Nepal           | Li et al., 2015      | SE |
| 42 | <i>M. alba</i> | ZMUC, 93.421  | KT031292 | KT031342 | – | Nepal, Dingla        | Nepal           | Li et al., 2015      | SE |
| 43 | <i>M. alba</i> | ZMUC, 25.793  | KT031287 | KT031337 | – | Afghanistan,Nuristan | Afghanista<br>n | Li et al., 2015      | SE |
| 44 | <i>M. alba</i> | ZMUC, 25.792  | KT031293 | KT031343 | – | Afghanistan,Nuristan | Afghanista<br>n | Li et al., 2015      | SE |
| 45 | <i>M. alba</i> | ZMUC, 21.429  | KT031294 | KT031344 | – | England, UK          | British Isles   | Li et al., 2015      | SW |
| 46 | <i>M. alba</i> | ZMUC, 21.432  | KT031288 | KT031338 | – | England, UK          | British Isles   | Li et al., 2015      | SW |
| 47 | <i>M. alba</i> | UU Masub Ma06 | KT031332 | KT031382 | – | Ouerzazate           | Morocco         | Li et al., 2015      | N  |
| 48 | <i>M. alba</i> | UU Masub Ma07 | KT031333 | KT031383 | – | Ouerzazate           | Morocco         | Li et al., 2015      | M  |
| 49 | <i>M. alba</i> | UU Masub PAC1 | KT031334 | KT031384 | – |                      | Morocco         | Li et al., 2015      | M  |
| 50 | <i>M. alba</i> | KU ATP 99-225 | KT031335 | KT031385 | – |                      | British Isles   | Li et al., 2015      | N  |
| 51 | <i>M. alba</i> | UWBM, 58385   | AY681496 | AY681730 | – | Norway               | Norway          | Pavlova et al., 2005 | N  |
| 52 | <i>M. alba</i> | UWBM, 49417   | AY681497 | AY681731 | – | Kurskaya             | Kursk           | Pavlova et al., 2005 | N  |

|    |                |             |          |          |   |             |          |                      |   |
|----|----------------|-------------|----------|----------|---|-------------|----------|----------------------|---|
| 53 | <i>M. alba</i> | UWBM, 61124 | AY681498 | AY681732 | – | Smolenskaya | Smolensk | Pavlova et al., 2005 | N |
| 54 | <i>M. alba</i> | UWBM, 49718 | AY681499 | AY681733 | – | Murmanskaya | Murmansk | Pavlova et al., 2005 | N |
| 55 | <i>M. alba</i> | UWBM, 49726 | AY681500 | AY681734 | – | Murmanskaya | Murmansk | Pavlova et al., 2005 | N |
| 56 | <i>M. alba</i> | UWBM, 49736 | AY681501 | AY681735 | – | Murmanskaya | Murmansk | Pavlova et al., 2005 | N |
| 57 | <i>M. alba</i> | UWBM, 49745 | AY681502 | AY681736 | – | Murmanskaya | Murmansk | Pavlova et al., 2005 | N |
| 58 | <i>M. alba</i> | UWBM, 49242 | AY681503 | AY681737 | – | Moscovskaya | Moscow   | Pavlova et al., 2005 | N |
| 59 | <i>M. alba</i> | UWBM, 49196 | AY681504 | AY681738 | – | Moscovskaya | Moscow   | Pavlova et al., 2005 | N |
| 60 | <i>M. alba</i> | UWBM, 60954 | AY681505 | AY681739 | – | Moscovskaya | Moscow   | Pavlova et al., 2005 | N |
| 61 | <i>M. alba</i> | UWBM, 61317 | AY681506 | AY681740 | – | Moscovskaya | Moscow   | Pavlova et al., 2005 | N |
| 62 | <i>M. alba</i> | UWBM, 61321 | AY681507 | AY681741 | – | Moscovskaya | Moscow   | Pavlova et al., 2005 | N |
| 63 | <i>M. alba</i> | UWBM, 49586 | AY681508 | AY681742 | – | Moscovskaya | Moscow   | Pavlova et al., 2005 | N |
| 64 | <i>M. alba</i> | UWBM, 49607 | AY681510 | AY681744 | – | Moscovskaya | Moscow   | Pavlova et al., 2005 | N |
| 65 | <i>M. alba</i> | UWBM, 61287 | AY681511 | AY681745 | – | Moscovskaya | Moscow   | Pavlova et al., 2005 | N |
| 66 | <i>M. alba</i> | UWBM, 59518 | AY681512 | AY681746 | – | Moscovskaya | Moscow   | Pavlova et al., 2005 | N |
| 67 | <i>M. alba</i> | UWBM, 61557 | AY681513 | AY681747 | – | Moscovskaya | Moscow   | Pavlova et al., 2005 | N |
| 68 | <i>M. alba</i> | UWBM, 61602 | AY681514 | AY681748 | – | Moscovskaya | Moscow   | Pavlova et al., 2005 | N |
| 69 | <i>M. alba</i> | UWBM, 61613 | AY681515 | AY681749 | – | Moscovskaya | Moscow   | Pavlova et al., 2005 | N |
| 70 | <i>M. alba</i> | UWBM, 61642 | AY681517 | AY681751 | – | Moscovskaya | Moscow   | Pavlova et al., 2005 | N |
| 71 | <i>M. alba</i> | UWBM, 61645 | AY681518 | AY681752 | – | Moscovskaya | Moscow   | Pavlova et al., 2005 | N |
| 72 | <i>M. alba</i> | UWBM, 61657 | AY681519 | AY681753 | – | Moscovskaya | Moscow   | Pavlova et al., 2005 | N |



|    |                |              |          |          |   |               |           |                      |   |
|----|----------------|--------------|----------|----------|---|---------------|-----------|----------------------|---|
| 73 | <i>M. alba</i> | UWBM, IUK138 | AY681520 | AY681754 | – | Moscovskaya   | Moscow    | Pavlova et al., 2005 | N |
| 74 | <i>M. alba</i> | UWBM, 57388  | AY681521 | AY681755 | – | Moscovskaya   | Moscow    | Pavlova et al., 2005 | N |
| 75 | <i>M. alba</i> | UWBM, IUK135 | AY681522 | AY681756 | – | Moscovskaya   | Moscow    | Pavlova et al., 2005 | N |
| 76 | <i>M. alba</i> | UWBM, 73801  | AY681523 | AY681757 | – | Buryatiya     | Buryatia  | Pavlova et al., 2005 | N |
| 77 | <i>M. alba</i> | UWBM, 73780  | AY681524 | AY681758 | – | Buryatiya     | Buryatia  | Pavlova et al., 2005 | N |
| 78 | <i>M. alba</i> | UWBM, 47246  | AY681525 | AY681759 | – | Sakhalinskaya | Sakhalin  | Pavlova et al., 2005 | N |
| 79 | <i>M. alba</i> | UWBM, 46962  | AY681526 | AY681760 | – | Sakhalinskaya | Sakhalin  | Pavlova et al., 2005 | N |
| 80 | <i>M. alba</i> | UWBM, 47243  | AY681527 | AY681761 | – | Sakhalinskaya | Sakhalin  | Pavlova et al., 2005 | N |
| 81 | <i>M. alba</i> | UWBM, 47247  | AY681528 | AY681762 | – | Sakhalinskaya | Sakhalin  | Pavlova et al., 2005 | N |
| 82 | <i>M. alba</i> | UWBM, 47248  | AY681529 | AY681763 | – | Sakhalinskaya | Sakhalin  | Pavlova et al., 2005 | N |
| 83 | <i>M. alba</i> | UWBM, 47265  | AY681530 | AY681764 | – | Sakhalinskaya | Sakhalin  | Pavlova et al., 2005 | N |
| 84 | <i>M. alba</i> | UWBM, 47266  | AY681531 | AY681765 | – | Sakhalinskaya | Sakhalin  | Pavlova et al., 2005 | N |
| 85 | <i>M. alba</i> | UWBM, 47267  | AY681532 | AY681766 | – | Sakhalinskaya | Sakhalin  | Pavlova et al., 2005 | N |
| 86 | <i>M. alba</i> | BMNH, 44265  | AY681533 | AY681767 | – | Medvedevo     | Medvedevo | Pavlova et al., 2005 | N |
| 87 | <i>M. alba</i> | BMNH, 44311  | AY681534 | AY681768 | – | Medvedevo     | Medvedevo | Pavlova et al., 2005 | N |
| 88 | <i>M. alba</i> | BMNH, 44271  | AY681535 | AY681769 | – | Medvedevo     | Medvedevo | Pavlova et al., 2005 | N |
| 89 | <i>M. alba</i> | BMNH, 44296  | AY681536 | AY681770 | – | Medvedevo     | Medvedevo | Pavlova et al., 2005 | N |
| 90 | <i>M. alba</i> | BMNH, 44608  | AY681537 | AY681771 | – | Medvedevo     | Medvedevo | Pavlova et al., 2005 | N |
| 91 | <i>M. alba</i> | BMNH, 44206  | AY681538 | AY681772 | – | Medvedevo     | Medvedevo | Pavlova et al., 2005 | N |
| 92 | <i>M. alba</i> | BMNH, 44234  | AY681539 | AY681773 | – | Medvedevo     | Medvedevo | Pavlova et al., 2005 | N |

|            |                |              |          |          |   |           |           |                      |   |
|------------|----------------|--------------|----------|----------|---|-----------|-----------|----------------------|---|
| <b>93</b>  | <i>M. alba</i> | BMNH, EVN325 | AY681540 | AY681774 | – | Medvedevo | Medvedevo | Pavlova et al., 2005 | N |
| <b>94</b>  | <i>M. alba</i> | BMNH, EVN338 | AY681541 | AY681775 | – | Medvedevo | Medvedevo | Pavlova et al., 2005 | N |
| <b>95</b>  | <i>M. alba</i> | BMNH, EVN358 | AY681542 | AY681776 | – | Medvedevo | Medvedevo | Pavlova et al., 2005 | N |
| <b>96</b>  | <i>M. alba</i> | BMNH, EVN361 | AY681543 | AY681777 | – | Medvedevo | Medvedevo | Pavlova et al., 2005 | N |
| <b>97</b>  | <i>M. alba</i> | BMNH, 44336  | AY681544 | AY681778 | – | Medvedevo | Medvedevo | Pavlova et al., 2005 | N |
| <b>98</b>  | <i>M. alba</i> | BMNH, 44382  | AY681545 | AY681779 | – | Medvedevo | Medvedevo | Pavlova et al., 2005 | N |
| <b>99</b>  | <i>M. alba</i> | BMNH, 44401  | AY681546 | AY681780 | – | Medvedevo | Medvedevo | Pavlova et al., 2005 | N |
| <b>100</b> | <i>M. alba</i> | BMNH, 44403  | AY681547 | AY681781 | – | Medvedevo | Medvedevo | Pavlova et al., 2005 | N |
| <b>101</b> | <i>M. alba</i> | BMNH, 44239  | AY681548 | AY681782 | – | Medvedevo | Medvedevo | Pavlova et al., 2005 | N |
| <b>102</b> | <i>M. alba</i> | BMNH, 44536  | AY681549 | AY681783 | – | Mezen     | Mezen     | Pavlova et al., 2005 | N |
| <b>103</b> | <i>M. alba</i> | BMNH, 44563  | AY681550 | AY681784 | – | Mezen     | Mezen     | Pavlova et al., 2005 | N |
| <b>104</b> | <i>M. alba</i> | BMNH, 44691  | AY681551 | AY681785 | – | Mezen     | Mezen     | Pavlova et al., 2005 | N |
| <b>105</b> | <i>M. alba</i> | BMNH, 44692  | AY681552 | AY681786 | – | Mezen     | Mezen     | Pavlova et al., 2005 | N |
| <b>106</b> | <i>M. alba</i> | BMNH, 44697  | AY681553 | AY681787 | – | Mezen     | Mezen     | Pavlova et al., 2005 | N |
| <b>107</b> | <i>M. alba</i> | BMNH, 44700  | AY681554 | AY681788 | – | Mezen     | Mezen     | Pavlova et al., 2005 | N |
| <b>108</b> | <i>M. alba</i> | BMNH, 44576  | AY681555 | AY681789 | – | Mezen     | Mezen     | Pavlova et al., 2005 | N |
| <b>109</b> | <i>M. alba</i> | BMNH, 44579  | AY681556 | AY681790 | – | Mezen     | Mezen     | Pavlova et al., 2005 | N |
| <b>110</b> | <i>M. alba</i> | BMNH, 44584  | AY681557 | AY681791 | – | Mezen     | Mezen     | Pavlova et al., 2005 | N |
| <b>111</b> | <i>M. alba</i> | BMNH, 44585  | AY681558 | AY681792 | – | Mezen     | Mezen     | Pavlova et al., 2005 | N |
| <b>112</b> | <i>M. alba</i> | BMNH, 44469  | AY681559 | AY681793 | – | Mezen     | Mezen     | Pavlova et al., 2005 | N |

|            |                |             |          |          |   |                 |          |                      |    |
|------------|----------------|-------------|----------|----------|---|-----------------|----------|----------------------|----|
| <b>113</b> | <i>M. alba</i> | BMNH, 44472 | AY681560 | AY681794 | – | Mezen           | Mezen    | Pavlova et al., 2005 | N  |
| <b>114</b> | <i>M. alba</i> | BMNH, 44473 | AY681561 | AY681795 | – | Mezen           | Mezen    | Pavlova et al., 2005 | N  |
| <b>115</b> | <i>M. alba</i> | UWBM, 51070 | AY681562 | AY681796 | – | Primorskiy Kray | Primor'e | Pavlova et al., 2005 | SE |
| <b>116</b> | <i>M. alba</i> | UWBM, 74897 | AY681563 | AY681797 | – | Primorskiy Kray | Primor'e | Pavlova et al., 2005 | SE |
| <b>117</b> | <i>M. alba</i> | UWBM, 75978 | AY681564 | AY681798 | – | Primorskiy Kray | Primor'e | Pavlova et al., 2005 | SE |
| <b>118</b> | <i>M. alba</i> | UWBM, 75979 | AY681565 | AY681799 | – | Primorskiy Kray | Primor'e | Pavlova et al., 2005 | N  |
| <b>119</b> | <i>M. alba</i> | UWBM, 76010 | AY681566 | AY681800 | – | Primorskiy Kray | Primor'e | Pavlova et al., 2005 | SE |
| <b>120</b> | <i>M. alba</i> | UWBM, 74954 | AY681567 | AY681801 | – | Primorskiy Kray | Primor'e | Pavlova et al., 2005 | N  |
| <b>121</b> | <i>M. alba</i> | UWBM, 51087 | AY681568 | AY681802 | – | Primorskiy Kray | Primor'e | Pavlova et al., 2005 | N  |
| <b>122</b> | <i>M. alba</i> | UWBM, 76005 | AY681569 | AY681803 | – | Primorskiy Kray | Primor'e | Pavlova et al., 2005 | N  |
| <b>123</b> | <i>M. alba</i> | UWBM, 76006 | AY681570 | AY681804 | – | Primorskiy Kray | Primor'e | Pavlova et al., 2005 | SE |
| <b>124</b> | <i>M. alba</i> | UWBM, 73435 | AY681571 | AY681805 | – | Irkutskaya      | Irkutsk  | Pavlova et al., 2005 | N  |
| <b>125</b> | <i>M. alba</i> | UWBM, 73438 | AY681572 | AY681806 | – | Irkutskaya      | Irkutsk  | Pavlova et al., 2005 | N  |
| <b>126</b> | <i>M. alba</i> | UWBM, 73462 | AY681573 | AY681807 | – | Irkutskaya      | Irkutsk  | Pavlova et al., 2005 | N  |
| <b>127</b> | <i>M. alba</i> | UWBM, 73533 | AY681574 | AY681808 | – | Irkutskaya      | Irkutsk  | Pavlova et al., 2005 | N  |
| <b>128</b> | <i>M. alba</i> | UWBM, 73532 | AY681575 | AY681809 | – | Irkutskaya      | Irkutsk  | Pavlova et al., 2005 | N  |
| <b>129</b> | <i>M. alba</i> | UWBM, 73709 | AY681576 | AY681810 | – | Irkutskaya      | Irkutsk  | Pavlova et al., 2005 | N  |
| <b>130</b> | <i>M. alba</i> | UWBM, 73658 | AY681577 | AY681811 | – | Irkutskaya      | Irkutsk  | Pavlova et al., 2005 | N  |
| <b>131</b> | <i>M. alba</i> | UWBM, 73735 | AY681578 | AY681812 | – | Irkutskaya      | Irkutsk  | Pavlova et al., 2005 | N  |
| <b>132</b> | <i>M. alba</i> | UWBM, 73748 | AY681579 | AY681813 | – | Irkutskaya      | Irkutsk  | Pavlova et al., 2005 | N  |

|            |                |             |          |          |   |                    |           |                      |    |
|------------|----------------|-------------|----------|----------|---|--------------------|-----------|----------------------|----|
| <b>133</b> | <i>M. alba</i> | UWBM, 66313 | AY681580 | AY681814 | – | Tuva               | Tuva      | Pavlova et al., 2005 | N  |
| <b>134</b> | <i>M. alba</i> | UWBM, 66331 | AY681581 | AY681815 | – | Tuva               | Tuva      | Pavlova et al., 2005 | N  |
| <b>135</b> | <i>M. alba</i> | UWBM, 66453 | AY681582 | AY681816 | – | Tuva               | Tuva      | Pavlova et al., 2005 | N  |
| <b>136</b> | <i>M. alba</i> | UWBM, 66468 | AY681583 | AY681817 | – | Tuva               | Tuva      | Pavlova et al., 2005 | N  |
| <b>137</b> | <i>M. alba</i> | UWBM, 66497 | AY681584 | AY681818 | – | Tuva               | Tuva      | Pavlova et al., 2005 | N  |
| <b>138</b> | <i>M. alba</i> | UWBM, 66653 | AY681585 | AY681819 | – | Tuva               | Tuva      | Pavlova et al., 2005 | N  |
| <b>139</b> | <i>M. alba</i> | UWBM, 66712 | AY681587 | AY681821 | – | Tuva               | Tuva      | Pavlova et al., 2005 | N  |
| <b>140</b> | <i>M. alba</i> | UWBM, 66728 | AY681588 | AY681822 | – | Tuva               | Tuva      | Pavlova et al., 2005 | N  |
| <b>141</b> | <i>M. alba</i> | UWBM, 66727 | AY681589 | AY681823 | – | Tuva               | Tuva      | Pavlova et al., 2005 | N  |
| <b>142</b> | <i>M. alba</i> | UWBM, 67630 | AY681590 | AY681824 | – | Tuva               | Tuva      | Pavlova et al., 2005 | N  |
| <b>143</b> | <i>M. alba</i> | UWBM, 67631 | AY681591 | AY681825 | – | Tuva               | Tuva      | Pavlova et al., 2005 | N  |
| <b>144</b> | <i>M. alba</i> | UWBM, 71061 | AY681592 | AY681826 | – | Tuva               | Tuva      | Pavlova et al., 2005 | N  |
| <b>145</b> | <i>M. alba</i> | UWBM, 71062 | AY681593 | AY681827 | – | Tuva               | Tuva      | Pavlova et al., 2005 | N  |
| <b>146</b> | <i>M. alba</i> | UWBM, 71115 | AY681594 | AY681828 | – | Tuva               | Tuva      | Pavlova et al., 2005 | N  |
| <b>147</b> | <i>M. alba</i> | UWBM, 67638 | AY681595 | AY681829 | – | Tuva               | Tuva      | Pavlova et al., 2005 | N  |
| <b>148</b> | <i>M. alba</i> | UWBM, 66420 | AY681596 | AY681830 | – | Kostroma           | Kostroma  | Pavlova et al., 2005 | N  |
| <b>149</b> | <i>M. alba</i> | UWBM, 66752 | AY681597 | AY681831 | – | Kostroma           | Kostroma  | Pavlova et al., 2005 | N  |
| <b>150</b> | <i>M. alba</i> | UWBM, 61443 | AY681598 | AY681832 | – | Krasnodarskiy Kray | Krasnodar | Pavlova et al., 2005 | SW |
| <b>151</b> | <i>M. alba</i> | UWBM, 61423 | AY681599 | AY681833 | – | Krasnodarskiy Kray | Krasnodar | Pavlova et al., 2005 | SW |
| <b>152</b> | <i>M. alba</i> | UWBM, 61449 | AY681600 | AY681834 | – | Krasnodarskiy Kray | Krasnodar | Pavlova et al., 2005 | SW |

|            |                |             |          |          |   |                    |           |                      |    |
|------------|----------------|-------------|----------|----------|---|--------------------|-----------|----------------------|----|
| <b>153</b> | <i>M. alba</i> | UWBM, 61488 | AY681602 | AY681836 | – | Krasnodarskiy Kray | Krasnodar | Pavlova et al., 2005 | SW |
| <b>154</b> | <i>M. alba</i> | UWBM, 64606 | AY681603 | AY681837 | – | Krasnodarskiy Kray | Krasnodar | Pavlova et al., 2005 | SW |
| <b>155</b> | <i>M. alba</i> | UWBM, 64607 | AY681604 | AY681838 | – | Krasnodarskiy Kray | Krasnodar | Pavlova et al., 2005 | N  |
| <b>156</b> | <i>M. alba</i> | UWBM, 64608 | AY681605 | AY681839 | – | Krasnodarskiy Kray | Krasnodar | Pavlova et al., 2005 | SW |
| <b>157</b> | <i>M. alba</i> | UWBM, 71214 | AY681606 | AY681840 | – | Krasnodarskiy Kray | Krasnodar | Pavlova et al., 2005 | SW |
| <b>158</b> | <i>M. alba</i> | UWBM, 71216 | AY681607 | AY681841 | – | Krasnodarskiy Kray | Krasnodar | Pavlova et al., 2005 | SW |
| <b>159</b> | <i>M. alba</i> | UWBM, 64630 | AY681608 | AY681842 | – | Krasnodarskiy Kray | Krasnodar | Pavlova et al., 2005 | N  |
| <b>160</b> | <i>M. alba</i> | UWBM, 64631 | AY681609 | AY681843 | – | Krasnodarskiy Kray | Krasnodar | Pavlova et al., 2005 | SW |
| <b>161</b> | <i>M. alba</i> | UWBM, 64632 | AY681610 | AY681844 | – | Krasnodarskiy Kray | Krasnodar | Pavlova et al., 2005 | N  |
| <b>162</b> | <i>M. alba</i> | UWBM, 64639 | AY681611 | AY681845 | – | Krasnodarskiy Kray | Krasnodar | Pavlova et al., 2005 | SW |
| <b>163</b> | <i>M. alba</i> | UWBM, 71223 | AY681612 | AY681846 | – | Krasnodarskiy Kray | Krasnodar | Pavlova et al., 2005 | SW |
| <b>164</b> | <i>M. alba</i> | UWBM, 64724 | AY681613 | AY681847 | – | Krasnodarskiy Kray | Krasnodar | Pavlova et al., 2005 | SW |
| <b>165</b> | <i>M. alba</i> | UWBM, 64725 | AY681614 | AY681848 | – | Krasnodarskiy Kray | Krasnodar | Pavlova et al., 2005 | SW |
| <b>166</b> | <i>M. alba</i> | UWBM, 64850 | AY681615 | AY681849 | – | Krasnodarskiy Kray | Krasnodar | Pavlova et al., 2005 | SW |
| <b>167</b> | <i>M. alba</i> | UWBM, 64852 | AY681616 | AY681850 | – | Krasnodarskiy Kray | Krasnodar | Pavlova et al., 2005 | SW |
| <b>168</b> | <i>M. alba</i> | UWBM, 61489 | AY681617 | AY681851 | – | Krasnodarskiy Kray | Krasnodar | Pavlova et al., 2005 | N  |
| <b>169</b> | <i>M. alba</i> | UWBM, 44439 | AY681618 | AY681852 | – | Magadanskaya       | Magadan   | Pavlova et al., 2005 | N  |
| <b>170</b> | <i>M. alba</i> | UWBM, 44440 | AY681619 | AY681853 | – | Magadanskaya       | Magadan   | Pavlova et al., 2005 | N  |
| <b>171</b> | <i>M. alba</i> | UWBM, 44631 | AY681620 | AY681854 | – | Magadanskaya       | Magadan   | Pavlova et al., 2005 | N  |
| <b>172</b> | <i>M. alba</i> | UWBM, 44633 | AY681621 | AY681855 | – | Magadanskaya       | Magadan   | Pavlova et al., 2005 | N  |

|            |                |             |          |          |   |                  |           |                      |    |
|------------|----------------|-------------|----------|----------|---|------------------|-----------|----------------------|----|
| <b>173</b> | <i>M. alba</i> | UWBM, 44640 | AY681622 | AY681856 | – | Magadanskaya     | Magadan   | Pavlova et al., 2005 | N  |
| <b>174</b> | <i>M. alba</i> | UWBM, 44647 | AY681623 | AY681857 | – | Magadanskaya     | Magadan   | Pavlova et al., 2005 | N  |
| <b>175</b> | <i>M. alba</i> | UWBM, 51666 | AY681624 | AY681858 | – | Magadanskaya     | Magadan   | Pavlova et al., 2005 | N  |
| <b>176</b> | <i>M. alba</i> | UWBM, 56834 | AY681625 | AY681859 | – | Astrakhanskaya   | Astrakhan | Pavlova et al., 2005 | N  |
| <b>177</b> | <i>M. alba</i> | UWBM, 56835 | AY681626 | AY681860 | – | Astrakhanskaya   | Astrakhan | Pavlova et al., 2005 | N  |
| <b>178</b> | <i>M. alba</i> | UWBM, 56864 | AY681627 | AY681861 | – | Astrakhanskaya   | Astrakhan | Pavlova et al., 2005 | N  |
| <b>179</b> | <i>M. alba</i> | UWBM, 56865 | AY681628 | AY681862 | – | Astrakhanskaya   | Astrakhan | Pavlova et al., 2005 | N  |
| <b>180</b> | <i>M. alba</i> | UWBM, 56866 | AY681629 | AY681863 | – | Astrakhanskaya   | Astrakhan | Pavlova et al., 2005 | N  |
| <b>181</b> | <i>M. alba</i> | UWBM, 59558 | AY681630 | AY681864 | – | Yamal Labytnangi | Yamal     | Pavlova et al., 2005 | N  |
| <b>182</b> | <i>M. alba</i> | UWBM, 59618 | AY681631 | AY681865 | – | Yamal Labytnangi | Yamal     | Pavlova et al., 2005 | N  |
| <b>183</b> | <i>M. alba</i> | UWBM, 59619 | AY681632 | AY681866 | – | Yamal Labytnangi | Yamal     | Pavlova et al., 2005 | N  |
| <b>184</b> | <i>M. alba</i> | UWBM, 59637 | AY681633 | AY681867 | – | Yamal Labytnangi | Yamal     | Pavlova et al., 2005 | N  |
| <b>185</b> | <i>M. alba</i> | UWBM, 59649 | AY681634 | AY681868 | – | Yamal Labytnangi | Yamal     | Pavlova et al., 2005 | N  |
| <b>186</b> | <i>M. alba</i> | UWBM, 59796 | AY681635 | AY681869 | – | Mongolia         | Mongolia  | Pavlova et al., 2005 | N  |
| <b>187</b> | <i>M. alba</i> | UWBM, 56933 | AY681636 | AY681870 | – | Noyabr'sk        | Noyabr'sk | Pavlova et al., 2005 | N  |
| <b>188</b> | <i>M. alba</i> | UWBM, 46420 | AY681637 | AY681871 | – | Almaty           | Almaty    | Pavlova et al., 2005 | SE |
| <b>189</b> | <i>M. alba</i> | UWBM, 61007 | AY681639 | AY681873 | – | Moscovskaya      | Moscow    | Pavlova et al., 2005 | N  |
| <b>190</b> | <i>M. alba</i> | UWBM, 61009 | AY681641 | AY681875 | – | Moscovskaya      | Moscow    | Pavlova et al., 2005 | N  |
| <b>191</b> | <i>M. alba</i> | UWBM, 61014 | AY681642 | AY681876 | – | Moscovskaya      | Moscow    | Pavlova et al., 2005 | N  |
| <b>192</b> | <i>M. alba</i> | UWBM, 61016 | AY681643 | AY681877 | – | Moscovskaya      | Moscow    | Pavlova et al., 2005 | N  |

|            |                |             |          |          |   |                    |             |                      |    |
|------------|----------------|-------------|----------|----------|---|--------------------|-------------|----------------------|----|
| <b>193</b> | <i>M. alba</i> | UWBM, 61017 | AY681644 | AY681878 | – | Moscovskaya        | Moscow      | Pavlova et al., 2005 | N  |
| <b>194</b> | <i>M. alba</i> | UWBM, 61244 | AY681646 | AY681880 | – | Krasnodarskiy Kray | Krasnodar   | Pavlova et al., 2005 | SW |
| <b>195</b> | <i>M. alba</i> | UWBM, 61245 | AY681647 | AY681881 | – | Krasnodarskiy Kray | Krasnodar   | Pavlova et al., 2005 | SW |
| <b>196</b> | <i>M. alba</i> | UWBM, 61246 | AY681648 | AY681882 | – | Krasnodarskiy Kray | Krasnodar   | Pavlova et al., 2005 | SW |
| <b>197</b> | <i>M. alba</i> | UWBM, 61285 | AY681649 | AY681883 | – | Moscovskaya        | Moscow      | Pavlova et al., 2005 | N  |
| <b>198</b> | <i>M. alba</i> | UWBM, 61286 | AY681650 | AY681884 | – | Moscovskaya        | Moscow      | Pavlova et al., 2005 | N  |
| <b>199</b> | <i>M. alba</i> | UWBM, 59407 | AY681651 | AY681885 | – | Yamal Labytnangi   | Yamal       | Pavlova et al., 2005 | N  |
| <b>200</b> | <i>M. alba</i> | UWBM, 59408 | AY681652 | AY681886 | – | Yamal Labytnangi   | Yamal       | Pavlova et al., 2005 | N  |
| <b>201</b> | <i>M. alba</i> | UWBM, 59409 | AY681653 | AY681887 | – | Yamal Labytnangi   | Yamal       | Pavlova et al., 2005 | N  |
| <b>202</b> | <i>M. alba</i> | UWBM, 59429 | AY681654 | AY681888 | – | Yamal Labytnangi   | Yamal       | Pavlova et al., 2005 | N  |
| <b>203</b> | <i>M. alba</i> | UWBM, 59495 | AY681655 | AY681889 | – | Moscovskaya        | Moscow      | Pavlova et al., 2005 | N  |
| <b>204</b> | <i>M. alba</i> | UWBM, 59500 | AY681656 | AY681890 | – | Yamal Labytnangi   | Yamal       | Pavlova et al., 2005 | N  |
| <b>205</b> | <i>M. alba</i> | UWBM, 46564 | AY681657 | AY681891 | – | Gorno-Altay        | Gorno-Altay | Pavlova et al., 2005 | N  |
| <b>206</b> | <i>M. alba</i> | UWBM, 59554 | AY681658 | AY681892 | – | Sverdlovsk         | Sverdlovsk  | Pavlova et al., 2005 | N  |
| <b>207</b> | <i>M. alba</i> | UWBM, 46410 | AY681659 | AY681893 | – | Almaty             | Almaty      | Pavlova et al., 2005 | SE |
| <b>208</b> | <i>M. alba</i> | UWBM, 46411 | AY681660 | AY681894 | – | Almaty             | Almaty      | Pavlova et al., 2005 | SE |
| <b>209</b> | <i>M. alba</i> | UWBM, 46304 | AY681661 | AY681895 | – | Gorno-Altay        | Gorno-Altay | Pavlova et al., 2005 | N  |
| <b>210</b> | <i>M. alba</i> | UWBM, 49543 | AY681662 | AY681896 | – | Sverdlovsk         | Sverdlovsk  | Pavlova et al., 2005 | N  |
| <b>211</b> | <i>M. alba</i> | UWBM, 51794 | AY681663 | AY681897 | – | Krasnodarskiy Kray | Krasnodar   | Pavlova et al., 2005 | N  |
| <b>212</b> | <i>M. alba</i> | UWBM, 51793 | AY681664 | AY681898 | – | Krasnodarskiy Kray | Krasnodar   | Pavlova et al., 2005 | N  |

|            |                |             |          |          |   |                |            |                      |    |
|------------|----------------|-------------|----------|----------|---|----------------|------------|----------------------|----|
| <b>213</b> | <i>M. alba</i> | UWBM, 46419 | AY681665 | AY681899 | – | Almaty         | Almaty     | Pavlova et al., 2005 | SE |
| <b>214</b> | <i>M. alba</i> | UWBM, 59795 | AY681666 | AY681900 | – | Mongolia       | Mongolia   | Pavlova et al., 2005 | N  |
| <b>215</b> | <i>M. alba</i> | UWBM, 59983 | AY681667 | AY681901 | – | Mongolia       | Mongolia   | Pavlova et al., 2005 | N  |
| <b>216</b> | <i>M. alba</i> | UWBM, 59785 | AY681668 | AY681902 | – | Mongolia       | Mongolia   | Pavlova et al., 2005 | N  |
| <b>217</b> | <i>M. alba</i> | UWBM, 49536 | AY681669 | AY681903 | – | Sverdlovsk     | Sverdlovsk | Pavlova et al., 2005 | N  |
| <b>218</b> | <i>M. alba</i> | UWBM, 49554 | AY681670 | AY681904 | – | Sverdlovsk     | Sverdlovsk | Pavlova et al., 2005 | N  |
| <b>219</b> | <i>M. alba</i> | UWBM, 49555 | AY681671 | AY681905 | – | Sverdlovsk     | Sverdlovsk | Pavlova et al., 2005 | N  |
| <b>220</b> | <i>M. alba</i> | UWBM, 56966 | AY681672 | AY681906 | – | Noyabr'sk      | Noyabr'sk  | Pavlova et al., 2005 | N  |
| <b>221</b> | <i>M. alba</i> | UWBM, 56975 | AY681673 | AY681907 | – | Noyabr'sk      | Noyabr'sk  | Pavlova et al., 2005 | N  |
| <b>222</b> | <i>M. alba</i> | UWBM, 56523 | AY681674 | AY681908 | – | Noyabr'sk      | Noyabr'sk  | Pavlova et al., 2005 | N  |
| <b>223</b> | <i>M. alba</i> | UWBM, 56778 | AY681675 | AY681909 | – | Noyabr'sk      | Noyabr'sk  | Pavlova et al., 2005 | N  |
| <b>224</b> | <i>M. alba</i> | UWBM, 56536 | AY681676 | AY681910 | – | Noyabr'sk      | Noyabr'sk  | Pavlova et al., 2005 | N  |
| <b>225</b> | <i>M. alba</i> | UWBM, 56551 | AY681677 | AY681911 | – | Noyabr'sk      | Noyabr'sk  | Pavlova et al., 2005 | N  |
| <b>226</b> | <i>M. alba</i> | UWBM, 56567 | AY681678 | AY681912 | – | Noyabr'sk      | Noyabr'sk  | Pavlova et al., 2005 | N  |
| <b>227</b> | <i>M. alba</i> | UWBM, 56828 | AY681679 | AY681913 | – | Noyabr'sk      | Noyabr'sk  | Pavlova et al., 2005 | N  |
| <b>228</b> | <i>M. alba</i> | UWBM, 56824 | AY681680 | AY681914 | – | Noyabr'sk      | Noyabr'sk  | Pavlova et al., 2005 | N  |
| <b>229</b> | <i>M. alba</i> | UWBM, 56447 | AY681681 | AY681915 | – | Astrakhanskaya | Astrakhan  | Pavlova et al., 2005 | N  |
| <b>230</b> | <i>M. alba</i> | UWBM, 56633 | AY681682 | AY681916 | – | Astrakhanskaya | Astrakhan  | Pavlova et al., 2005 | N  |
| <b>231</b> | <i>M. alba</i> | UWBM, 56667 | AY681683 | AY681917 | – | Astrakhanskaya | Astrakhan  | Pavlova et al., 2005 | N  |
| <b>232</b> | <i>M. alba</i> | UWBM, 56668 | AY681684 | AY681918 | – | Astrakhanskaya | Astrakhan  | Pavlova et al., 2005 | N  |



|     |                |             |          |          |   |                   |            |                      |   |
|-----|----------------|-------------|----------|----------|---|-------------------|------------|----------------------|---|
| 233 | <i>M. alba</i> | UWBM, 56669 | AY681685 | AY681919 | – | Astrakhanskaya    | Astrakhan  | Pavlova et al., 2005 | N |
| 234 | <i>M. alba</i> | UWBM, 47169 | AY681686 | AY681920 | – | Khabarovsk        | Khabarovsk | Pavlova et al., 2005 | N |
| 235 | <i>M. alba</i> | UWBM, 47161 | AY681687 | AY681921 | – | Khabarovsk        | Khabarovsk | Pavlova et al., 2005 | N |
| 236 | <i>M. alba</i> | UWBM, 47170 | AY681688 | AY681922 | – | Khabarovsk        | Khabarovsk | Pavlova et al., 2005 | N |
| 237 | <i>M. alba</i> | UWBM, 47189 | AY681689 | AY681923 | – | Khabarovsk        | Khabarovsk | Pavlova et al., 2005 | N |
| 238 | <i>M. alba</i> | UWBM, 47244 | AY681690 | AY681924 | – | Sakhalinskaya     | Sakhalin   | Pavlova et al., 2005 | N |
| 239 | <i>M. alba</i> | UWBM, 47245 | AY681691 | AY681925 | – | Sakhalinskaya     | Sakhalin   | Pavlova et al., 2005 | N |
| 240 | <i>M. alba</i> | UWBM, 46991 | AY681692 | AY681926 | – | Sakhalinskaya     | Sakhalin   | Pavlova et al., 2005 | N |
| 241 | <i>M. alba</i> | UWBM, 43820 | AY681693 | AY681927 | – | Magadanskaya      | Magadan    | Pavlova et al., 2005 | N |
| 242 | <i>M. alba</i> | UWBM, 43837 | AY681695 | AY681929 | – | Magadanskaya      | Magadan    | Pavlova et al., 2005 | N |
| 243 | <i>M. alba</i> | UWBM, 44099 | AY681697 | AY681931 | – | Magadanskaya      | Magadan    | Pavlova et al., 2005 | N |
| 244 | <i>M. alba</i> | UWBM, 44106 | AY681698 | AY681932 | – | Magadanskaya      | Magadan    | Pavlova et al., 2005 | N |
| 245 | <i>M. alba</i> | UWBM, 44591 | AY681699 | AY681933 | – | Kamchatka         | Kamchatka  | Pavlova et al., 2005 | N |
| 246 | <i>M. alba</i> | UWBM, 44605 | AY681700 | AY681934 | – | Kamchatka         | Kamchatka  | Pavlova et al., 2005 | N |
| 247 | <i>M. alba</i> | UWBM, 44592 | AY681701 | AY681935 | – | Kamchatka         | Kamchatka  | Pavlova et al., 2005 | N |
| 248 | <i>M. alba</i> | UWBM, 44255 | AY681702 | AY681936 | – | Yakutiya Cherskiy | Cherskiy   | Pavlova et al., 2005 | N |
| 249 | <i>M. alba</i> | UWBM, 44582 | AY681703 | AY681937 | – | Kamchatka         | Kamchatka  | Pavlova et al., 2005 | N |
| 250 | <i>M. alba</i> | UWBM, 44588 | AY681704 | AY681938 | – | Kamchatka         | Kamchatka  | Pavlova et al., 2005 | N |
| 251 | <i>M. alba</i> | UWBM, 44587 | AY681705 | AY681939 | – | Kamchatka         | Kamchatka  | Pavlova et al., 2005 | N |

|     |                |              |          |          |   |               |           |                      |   |
|-----|----------------|--------------|----------|----------|---|---------------|-----------|----------------------|---|
| 252 | <i>M. alba</i> | UWBM, 44606  | AY681706 | AY681940 | – | Kamchatka     | Kamchatka | Pavlova et al., 2005 | N |
| 253 | <i>M. alba</i> | UWBM, 44590  | AY681707 | AY681941 | – | Kamchatka     | Kamchatka | Pavlova et al., 2005 | N |
| 254 | <i>M. alba</i> | UWBM, 44320  | AY681708 | AY681942 | – | Kamchatka     | Kamchatka | Pavlova et al., 2005 | N |
| 255 | <i>M. alba</i> | UWBM, 44586  | AY681709 | AY681943 | – | Kamchatka     | Kamchatka | Pavlova et al., 2005 | N |
| 256 | <i>M. alba</i> | UWBM, 44589  | AY681710 | AY681944 | – | Kamchatka     | Kamchatka | Pavlova et al., 2005 | N |
| 257 | <i>M. alba</i> | UWBM, 49570  | AY681711 | AY681945 | – | Moscovskaya   | Moscow    | Pavlova et al., 2005 | N |
| 258 | <i>M. alba</i> | UWBM, 47264  | AY681712 | AY681946 | – | Sakhalinskaya | Sakhalin  | Pavlova et al., 2005 | N |
| 259 | <i>M. alba</i> | BMNH, 44766  | AY681713 | AY681947 | – | Anadyr        | Anadyr'   | Pavlova et al., 2005 | N |
| 260 | <i>M. alba</i> | BMNH, IVF402 | AY681714 | AY681948 | – | Anadyr        | Anadyr'   | Pavlova et al., 2005 | N |
| 261 | <i>M. alba</i> | BMNH, 44963  | AY681715 | AY681949 | – | Anadyr        | Anadyr'   | Pavlova et al., 2005 | N |
| 262 | <i>M. alba</i> | BMNH, 44962  | AY681716 | AY681950 | – | Anadyr        | Anadyr'   | Pavlova et al., 2005 | N |
| 263 | <i>M. alba</i> | BMNH, EVN473 | AY681717 | AY681951 | – | Anadyr        | Anadyr'   | Pavlova et al., 2005 | N |
| 264 | <i>M. alba</i> | BMNH, 44783  | AY681718 | AY681952 | – | Anadyr        | Anadyr'   | Pavlova et al., 2005 | N |
| 265 | <i>M. alba</i> | BMNH, 44904  | AY681719 | AY681953 | – | Anadyr        | Anadyr'   | Pavlova et al., 2005 | N |
| 266 | <i>M. alba</i> | BMNH, EVN464 | AY681720 | AY681954 | – | Anadyr        | Anadyr'   | Pavlova et al., 2005 | N |
| 267 | <i>M. alba</i> | BMNH, IVF408 | AY681721 | AY681955 | – | Anadyr        | Anadyr'   | Pavlova et al., 2005 | N |
| 268 | <i>M. alba</i> | BMNH, IVF414 | AY681722 | AY681956 | – | Anadyr        | Anadyr'   | Pavlova et al., 2005 | N |
| 269 | <i>M. alba</i> | BMNH, 44903  | AY681723 | AY681957 | – | Anadyr        | Anadyr'   | Pavlova et al., 2005 | N |
| 270 | <i>M. alba</i> | BMNH, EVN515 | AY681724 | AY681958 | – | Anadyr        | Anadyr'   | Pavlova et al., 2005 | N |
| 271 | <i>M. alba</i> | BMNH, 44823  | AY681725 | AY681959 | – | Anadyr        | Anadyr'   | Pavlova et al., 2005 | N |

|     |                           |              |          |          |   |        |         |                                        |              |
|-----|---------------------------|--------------|----------|----------|---|--------|---------|----------------------------------------|--------------|
| 272 | <i>M. alba</i>            | BMNH, IVF400 | AY681726 | AY681960 | – | Anadyr | Anadyr' | Pavlova et al., 2005                   | N            |
| 273 | <i>M. alba</i>            | BMNH, IVF377 | AY681727 | AY681961 | – | Anadyr | Anadyr' | Pavlova et al., 2005                   | N            |
| 339 | <i>M. maderaspetensis</i> | AMNH, 23223  | AF526470 | AY682721 | – | –      | –       | Voelker, 2002;<br>Pavlova et al., 2005 | out<br>group |

ZMFUM, Zoological Museum of Ferdowsi University of Mashhad, AMNH, American Museum of Natural History, New York, USA; BMNH, Bell Museum of Natural History, University of Minnesota, Minneapolis, USA; FMNH, Field Museum of Natural History, Chicago, USA; IOZ, Institute of Zoology, Chinese Academy of Sciences, Beijing, China; KIZ, Kunming Institute of Zoology, Chinese Academy of Sciences, Kunming, China; KUMNH, University of Kansas Biodiversity Institute, Lawrence, Kansas, USA; MBM, Marjorie Barrick Museum, University of Nevada Las Vegas, Las Vegas, USA; NRM, Swedish Museum of Natural History, Stockholm, Sweden; South China Institute of Endangered Animals (only S04486), Guangdong, China; UU, Uppsala University, Uppsala, Sweden; UWBM, Burke Museum of Natural History and Culture, University of Washington, Seattle, USA; ZMUC, Zoological Museum, University of Copenhagen, Copenhagen, Denmark. (The museum names are in alphabetical order)

## References

- Li, X., Dong, F., Lei, F., Alström, P., Zhang, R., Ödeen, A., Fjeldså, J., Ericson, P.G.P., Zou, F. & Yang, X. (2015) Shaped by uneven Pleistocene climate: mitochondrial phylogeographic pattern and population history of White Wagtail *Motacilla alba* (Aves: Passeriformes). *J. Avian Biol.*, 46, 001–012.
- Pavlova, A., Zink, R.M., Rohwer, S., Koblik, E.A., Red'kin, Y.A., Fadeev, I.V. & Nesterov, E.V. (2005) Mitochondrial DNA and plumage evolution in the white wagtail *Motacilla alba*. *J. Avian Biol.*, 36, 322–336.
- Voelker, G. (2002) Systematics and historical biogeography of wagtails: dispersal versus vicariance revisited. *Condor*, 104, 725–739.
